# Supplementary material for: Autoregulatory function of interleukin-10-producing pre-naïve B cells is defective in systemic lupus erythematosus
Source: Springer Nature journal article supplement (doi:10.1186/s13075-015-0687-1), 2015-07-24

Figure S1a

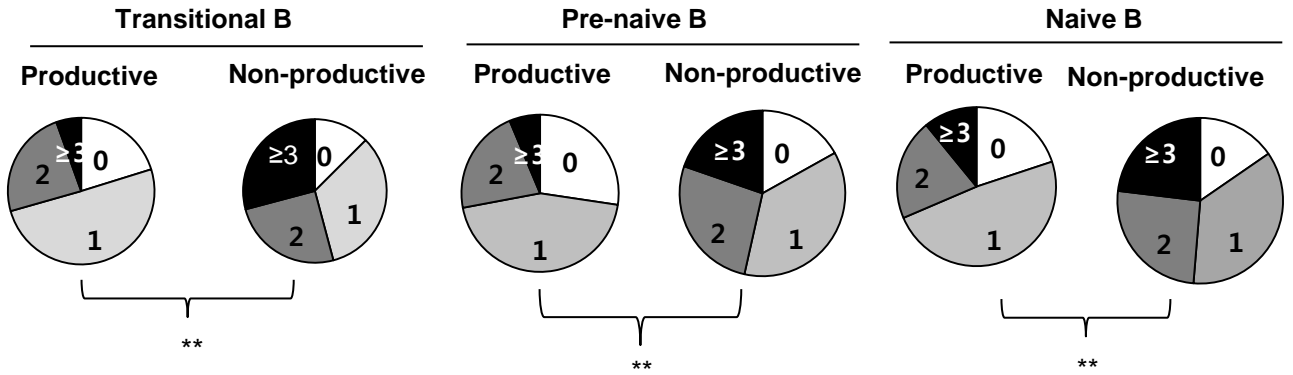

Figure S1b

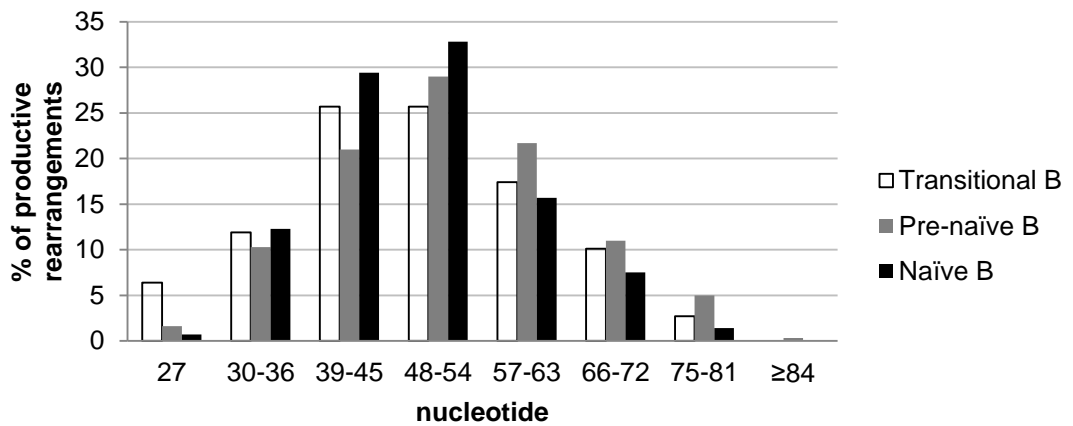

Supplement: MOESM1 [file 9783810]
